# Supplementary material for: Controlled release of plasmid DNA from gold nanorods induced by pulsed near-infrared light
Source: Royal Society of Chemistry journal article supplement (doi:10.1039/b500337g), 2005-01-01
Supplement: b500337g.pdf [file b500337g.pdf]

## Supplementary data

### Controlled Release of Plasmid DNA from Gold Nanorods Induced by Pulsed-Near-Infrared Light

Hironobu Takahashi,<sup>a</sup> Yasuro Niidome\*<sup>a,b</sup> and Sunao Yamada\*<sup>a,b</sup>

<sup>a</sup> Department of Materials Physics and Chemistry, and <sup>b</sup> Department of Applied Chemistry, Graduate School of Engineering, Kyushu University, Hakozaki, Fukuoka, 812-8581, Japan.; E-mail: ynidotcm@mbox.nc.kyushu-u.ac.jp, sunaotcm@mbox.nc.kyushu-u.ac.jp

Gel electrophoresis patterns of PC-NR/DNA complexes before (a) and after (b-f) 15 seconds of the laser irradiation are shown in Fig. S1. Before laser irradiation (a), all plasmid DNA remains in the well. After 100 (a) and 150 (b) mJ/pulse of laser irradiation, no fluorescent bands of migrated DNA can be seen in the gel. When 200, 250, and 300 mJ/pulse of laser light are irradiated onto the PC-NR/DNA complexes respectively (lane d-f), the fluorescent bands can be seen at the same position as that of the supercoiled DNA (ref). This indicates that the plasmid DNA are partially released from the PC-NR/DNA complexes by 15 seconds of the laser irradiation.

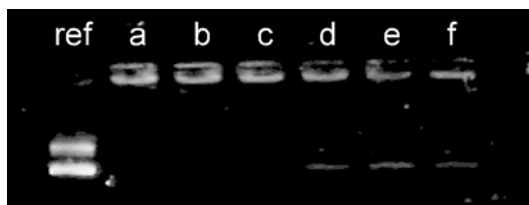

**Fig. S1** Agarose gel electrophoresis of plasmid DNA (ref), and PC-NR/DNA complexes before (a) and after (b-f) 15 seconds of laser irradiation. Plasmid DNA was mixed with 1 mM of PC-NR solutions (8  $\mu$ L) (“ref” is 0.05  $\mu$ g of plasmid DNA without PC-NRs). Laser intensities: (a) 0, (b) 100, (c) 150, (d) 200, (e) 250 and (f) 300 mJ/pulse. PC-NR/DNA complexes were electrophoresed in an agarose gel (1% w/v) and stained with SYBR<sup>®</sup> Green.
